# Supplementary material for: Discovery and structure characteristics of the intermediate-state conformation of poly(9,9-dioctylfluorene) (PFO) in the dynamic process of conformation transformation and its effects on carrier mobility
Source: Royal Society of Chemistry journal article supplement (doi:10.1039/c9ra07115f), 2020-01-01

## **Electronic Supplementary Information**

### **Discovery and Structure Characteristics of Intermediate-State Conformation of Poly(9,9-dioctylfluorene) (PFO) in Dynamic Process of Conformation Transformation and Its Effect on Carrier Mobility**

Bin Liu, Zeming Bai, Tao Li, Yang Liu, Xiaona Li, Hao Zhang, Dan Lu\*

Corresponding Author\*: E-mail [lud@jlu.edu.cn](mailto:lud@jlu.edu.cn) Phone: +86-136-2079-2963

State Key Laboratory of Supramolecular Structure and Materials, College of Chemistry, Jilin University, 2699 Qianjin Avenue, Changchun, 130012, China.

**Molecular Weight and Polydispersity Index of PFO.** PFO was purchased from American Dye Source, Catalog No. ADS329BE. The related parameters were got by Gel Permeation Chromatography (GPC), which was performed using a LC-20AD instrument with tetrahydrofuran as an eluent and polystyrene as the standard sample. The results were shown in Table 1.

**Table 1. Molecular Weight and Polydispersity Index of PFO**

| PFO | molecular weight(Mw)<br>(g.mol <sup>-1</sup> ) | number weight(Mn)<br>(g.mol <sup>-1</sup> ) | polydispersity index<br>(PDI) |
|-----|------------------------------------------------|---------------------------------------------|-------------------------------|
|     | 82232                                          | 60565                                       | 1.36                          |

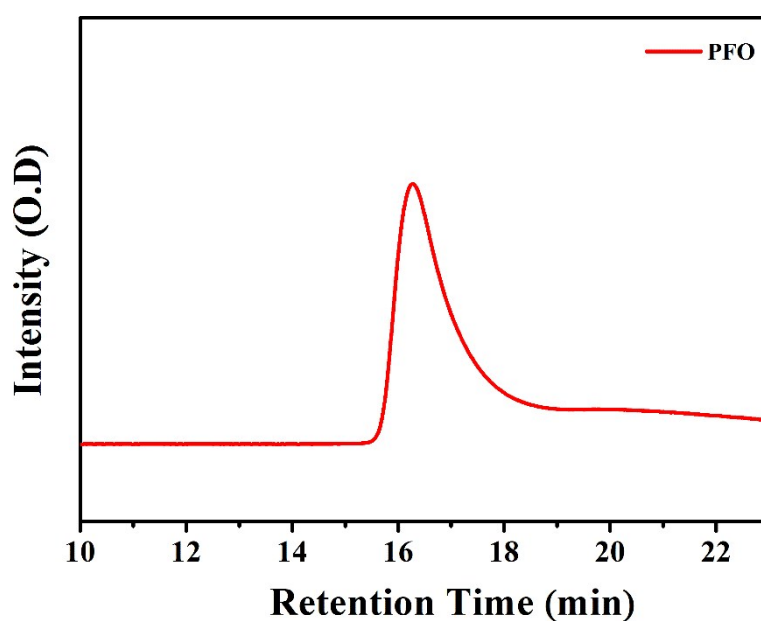

Supplement: c9ra07115f1.pdf [file c9ra07115f1.pdf]
